# Supplementary material for: Colonization with multi-drug-resistant organisms negatively impacts survival in patients with non-small cell lung cancer
Source: PLoS One. 2020 Nov 25;15(11):e0242544. doi: 10.1371/journal.pone.0242544 (PMC7688109; doi:10.1371/journal.pone.0242544)
Supplement: S1 File — (DOCX) [file pone.0242544.s002.docx]

Colonization with multi-drug-resistant organisms negatively impacts survival in patients with non-small cell lung cancer

Jan A. Stratmann1*; Raphael Lacko1, Olivier Ballo1, Shabnam Shaid1, Wolfgang Gleiber2, Maria J.G.T. Vehreschild3,7, Thomas Wichelhaus4,7,8, Claudia Reinheimer4,7,8, Stephan Göttig4,7, Volkhard A. J. Kempf4,7,8 Peter Kleine5, Susanne Stera6, Christian Brandts1,9, Martin Sebastian1, Sebastian Koschade1

1 Department of Internal Medicine, Hematology/Oncology, Goethe University, Frankfurt, Frankfurt am Main, Germany

2 Department of Internal Medicine, Pneumology, Goethe University, Frankfurt, Frankfurt am Main, Germany

3 Department of Internal Medicine, Infectious Diseases, Goethe University, Frankfurt, Frankfurt am Main, Germany

4 Institute of Medical Microbiology and Infection Control, Goethe University, Frankfurt, Frankfurt am Main, Germany

5 Department of Cardiothoracic Surgery, Goethe University, Frankfurt, Frankfurt am Main, Germany

6 Department of Radiation Oncology, Goethe University, Frankfurt, Frankfurt am Main, Germany

7 University Center for Infectious Diseases, Goethe University, Frankfurt, Frankfurt am Main, Germany

8 University Center of Competence for Infection Control, State of Hesse, Germany

9 University Cancer Center Frankfurt (UCT), Goethe University, Frankfurt, Germany

*Corresponding author: Email: [jan.stratmann@kgu.de](mailto:jan.stratmann@kgu.de); (JS)

**Colonization with multi-drug-resistant organisms negatively impacts survival in patients with non-small cell lung cancer**

Supplement

**S1 Figure**: Flow diagram showing the process of inclusion of eligible patients into the analysis.

**S2 Table:**

Multivariate analysis of risk factors for MDRO colonization

| Risk Factor | Comparator |  | OR | 95% CI | P value |
| --- | --- | --- | --- | --- | --- |
| Diabetes mellitus | No diabetes mellitus |  | 1.60 | (0.66—2.55) | <0.001 |
| Heart disease | No heart disease | -0.21 | (-1.40—0.86) | .72 |
| Kidney disease | No kidney disease | 0.08 | (-1.05—1.11) | .88 |
| Liver disease | No liver disease | -0.46 | (-4.08—1.76) | .74 |
| Gender: male | Gender: female | 0.91 | (-0.14—2.20) | .12 |
| Age at diagnosis |  | 0.03 | (-0.01—0.08) | .25 |
| ECOG: 1 | ECOG: 0 | -0.06 | (-1.16—1.17) | .92 |
| ECOG: 2 | ECOG: 0 | 0.49 | (-0.92—1.93) | .50 |
| ECOG: 3 | ECOG: 0 | -14.47 |  | .99 |
| ECOG: 4 | ECOG: 0 | 3.07 | (-0.62—6.85) | .08 |
|  |  |  |  |  |

Logistical regression analysis. MDRO, multidrug resistance organism; OR, odds ratio; CI, confidence interval.

| **S3 Table:** | |  | | | | |  | | | | |  | | | | | | | |  |
| --- | --- | --- | --- | --- | --- | --- | --- | --- | --- | --- | --- | --- | --- | --- | --- | --- | --- | --- | --- | --- |
| Patient and disease characteristics, comparative off-target analysis | | | | | | | | | | | |  | | | | | | | |  |
|  | |  | | | | | Off-Target  population (n = 107) | | | | | Patients included  into analysis (n=295) | | | | | | | | P value* |
| Gender | | female | | | | | 46 (43%) | | | | | 110 (37%) | | | | | | | | .30 |
|  | | male | | | | | 61 (56%) | | | | | 185 (63%) | | | | | | | | .30 |
| Age at diagnosis, median (range), years | |  | | | | | 62 (32-83) | | | | | 67 (29-90) | | | | | | | | .001 |
| Smoking history | |  | | | | | 93 (87%) | | | | | 209 (71%) | | | | | | | | .0001 |
| ECOG performance score  2 (%) | |  | | | | | 96 (90%) | | | | | 281 (95%) | | | | | | | | .04 |
| Disease stage according to UICC 7th | | IA | | | | | 1 (1%) | | | | | 50 (17%) | | | | | | | | .00001 |
|  | | IB | | | | | 1 (1%) | | | | | 19 (6%) | | | | | | | |
|  | | IIA | | | | | 1 (1%) | | | | | 22 (7%) | | | | | | | |
|  | | IIB | | | | | 1 (1%) | | | | | 25 (8%) | | | | | | | |
|  | | IIIA | | | | | 15 (14%) | | | | | 61 (21%) | | | | | | | |
|  | | IIIB | | | | | 11 (10%) | | | | | 19 (6%) | | | | | | | |
|  | | IV | | | | | 77 (72%) | | | | | 99 (34%) | | | | | | | |
| Presence of brain metastases | |  | | | | | 42 (39%) | | | | | 48 (16%) | | | | | | | | .00001 |
| Histology | | Adeno NSCLC | | | | | 83 (78%) | | | | | 160 (54%) | | | | | | | |  |
|  | | SCNSCLC | | | | | 23 (21%) | | | | | 127 (43%) | | | | | | | |  |
|  | | other | | | | | 0 (0%) | | | | | 8 (3%) | | | | | | | |  |
| Mutations (pos. / neg.) | | ALK | | | | | 6 (6%) / 32 (30%) | | | | | 3 (3%) / 32 (11%) | | | | | | | |  |
|  | | BRAF | | | | | 0 (0%) /5 (5%) | | | | | 2 (1%) / 5 (2%) | | | | | | | |  |
|  | | EGFR | | | | | 21/70 (30%) | | | | | 15 (5%) / 33 (11%) | | | | | | | | .0001 |
|  | | KRAS | | | | | 9 (8%) / 21 (20%) | | | | | 15 (5%) / 14 (5%) | | | | | | | |  |
|  | | ROS1 | | | | | 4 (4%) / 15 (14%) | | | | | 4 (1%) / 12 (4%) | | | | | | | |  |
| Comorbidities | | Diabetes | | | | | 6 (6%) | | | | | 56 (19%) | | | | | | | | .004 |
|  | | HIV | | | | | 1 (1%) | | | | | 9 (3%) | | | | | | | | .23 |
|  | | Heart disease | | | | | 10 (9%) | | | | | 60 (20%) | | | | | | | | .013 |
|  | | Kidney disease | | | | | 19 (18%) | | | | | 52 (18%) | | | | | | | | .89 |
|  | | Liver disease | | | | | 0 (0%) | | | | | 9 (31%) | | | | | | | | .07 |
| Count data is shown unless indicated otherwise. *Differences between off-target population (missing MDRO screening) and analyzed patients were tested. Mann-Whitney U test was used to calculate P value for age. Except for EGFR, gene mutations were not tested due to missing data. SCNSCLC, squamous cell NSCLC | | | | | | | | | | | | | | | | | | | | |
| **S4 Table** | | | | | | | | | | | | | | | | | |  |
| Classifikation of MDRO according to resistance phenotype | | | | | | | | | | | | | | | | | |  |
| **Enterbacteriaceae spp.** | | | | | | | | | | | | | | | | | |  |
|  | **Spp.** | | **Phenotype** |  | **A** | **B** | | **C** | **D** | **E** | **F** | | **G** | **H** | **I** | **J** | |  |
| **1** | *E. coli* | | ESBL |  |  |  | |  | S |  | S | | S | S | S | S | |
| **2** | *E. coli* | | ESBL |  |  |  | |  |  |  | S | |  | S | NT | S | |
| **3** | *E. coli* | | ESBL |  |  |  | |  |  | S |  | | S | S | S | S | |
| **4** | *E. coli* | | ESBL |  |  |  | |  |  |  | S | | S | S | S | S | |
| **5** | *E. coli* | | ESBL |  |  |  | |  |  |  |  | | S | S | S | S | |
| **6** | *E. coli* | | ESBL |  |  |  | |  | S | S |  | |  | S |  | S | |
| **7** | *E. coli* | | ESBL |  |  |  | |  |  | S |  | | S | S | NT | S | |
| **8** | *E. coli* | | ESBL |  |  |  | |  |  |  | S | | S | S | S | S | |
| **9** | *E. coli* | | ESBL |  |  |  | |  |  |  |  | |  | S | S | S | |
| **10** | *K. pneumoniae* | | ESBL |  |  |  | |  |  |  |  | |  |  | S | S | |
| **11** | *E. coli* | | ESBL |  |  |  | |  |  |  | S | | S | S | S | S | |
| **12** | *K. pneumoniae* | | ESBL |  |  |  | |  |  |  |  | |  | S | NT | S | |
| **13** | *E. coli* | | ESBL |  |  |  | |  |  |  | S | |  | S | NT | S | |
| **14** | *E. coli* | | ESBL |  |  |  | |  |  | S | S | | S | S | S | S | |
| **15** | *E. coli* | | ESBL |  |  |  | |  |  |  |  | | S | S | S | S | |
| **16** | *E. coli* | | ESBL |  |  |  | |  |  | S | S | | S | S | S | S | |
| **17** | *E. coli* | | ESBL |  |  |  | |  |  | S | S | | S | S | S | S | |
| **18** | *E. coli* | | ESBL |  |  |  | |  |  | S |  | | S |  | S | S | |
| **19** | *K. pneumoniae* | | ESBL |  |  |  | |  |  |  |  | | S | S |  | S | |
| A, 1st/2nd generation cephalosporins; B, 3rd/4th generation cephalosporins; C, penicilline + lactamase inhibitor; D, antipseudomonale penicillins; E, fluorquinolones; F, folate pathway inhibitors; G, aminolykoside; H, glycylcycline, I, phosphonic acids; J, carbapenems | | | | | | | | | | | | | | | | | |  |
| **Enterococcus spp.** | | |  |  |  |  | |  |  |  |  | |  |  |  |  | |  |
|  |  | |  |  | **A** | **B** | | **C** | **D** | **E** | **F** | | **G** | **H** | **I** |  |
| **20** | *E. faecium* | | vanB |  |  |  | |  |  |  | S | | S | S | S |
| **21** | *E. faecium* | | vanA |  |  |  | |  |  | S | S | | S | S | S |
| **22** | *E. faecium* | | vanB |  |  |  | |  |  | S | S | | S | S | S |
| **23** | *E. faecium* | | vanB |  |  |  | |  |  | S |  | | S | S | S |
| A, carbapenems; B, penicillins; C, fluorquinolones; D, glycopeptides; E, aminoglycoside; F, tetracycline; G, glycylcyclines; H, lipopetides; I, oxazolidinones | | | | | | | | | | | | | | | |  | |  |
| ***S. aureus*** |  | |  |  |  |  | |  |  |  |  | |  |  |  |  | |  |
|  |  | |  |  | **A** | **B** | | **C** | **D** | **E** | **F** | | **I** | **J** | **K** | **L** | | **M** |
| **24** | *S. aureus* | | MRSA |  |  |  | |  | S | S | S | | S | S | S | S | | S |
| A, fluoroquinolones; B, lincosamides; C, macrolides; D, aminoglycosides; E, ansamycins; F, folate pathway inhibitors; G, glycopeptides; H, glycylcyclines; I, phosphonic acids; J, oxazolidinones; K, tetracyclines; L, anti-staphylococcal b-lactams; M, fucidanes | | | | | | | | | | | |
| MDRO, multidrug resistant organisms; spp., species; E. coli., Escherichia Coli; Klebsiella P., Klebsiella Pneumoniae; E. faecium; Enterococcus Faecium; ESBL, Extended Spectrum Beta Lactamase; VRE, Vancomycin Resistant Enterococcus; MRSA, Methicilline Resistant Staphylococcus Aureus; spp., species; NT, not tested; black box indicates phenotypical non-susceptibility to all tested agents in the antimicrobial category | | | | | | | | | | | |

**S5 Table**

Multivariate analysis of risk factors for event or death

| Risk Factor | Comparator |  | HR | 95% CI | P value |
| --- | --- | --- | --- | --- | --- |
| MDRO colonization | No colonization |  | 1.32 | (0.75—2.31) | .34 |
| Gender: male | Gender: female | 1.11 | (0.82—1.52) | .50 |
| Age at diagnosis |  | 1.00 | (—) | .48 |
| Extensive disease | Limited disease | 3.57 | (2.60—4.90) | <.001 |
| Histology: SCC | Histology: adenocarcinoma | 1.25 | (0.92—1.71) | .15 |
| Histology: others | Histology: adenocarcinoma | 0.86 | (0.35—2.12) | .74 |
| ECOG: 1 | ECOG: 0 | 1.14 | (0.80—1.63) | .47 |
| ECOG: 2 | ECOG: 0 | 1.79 | (1.16—2.76) | .01 |
| ECOG: 3 | ECOG: 0 | 3.77 | (1.15—12.36) | .03 |
| ECOG: 4 | ECOG: 0 | 0.79 | (0.17—3.68) | .76 |
| Diabetes mellitus | No diabetes mellitus | 1.46 | (1.00—2.11) | .05 |
|  |  |  |  |  |

Cox proportional hazard regression analysis. MDRO, multidrug resistant organisms; SCC, squamous cell carcinoma; HR, hazard ratio; CI, confidence interval.

**S6 Figure:** Total numbers of hospital admissions for patients with colonization by multidrug resistant organisms (MDRO) and without MDRO colonization due to (A) all causes; (B) cancer-related causes; (C) infections; (D) provision of supportive care; (E) causes related to other cancers; (F) miscellaneous causes. Boxplots indicate median (horizontal line), 25th and 75th percentiles (lower and upper hinges), range of data values at most 1.5 * inter-quartile range from the 25th and 75th percentiles (whiskers), and individual outliers. P values for differences between patient groups were calculated by negative binomial regression. A zero-inflated negative binomial regression model was chosen if superior fit was indicated by the Vuong non-nested test. ns, not significant.

**S7 Figure:** Total durations of hospitalization in days for patients with colonization by multidrug resistant organisms (MDRO) and without MDRO colonization due to (A) all causes; (B) cancer-related causes; (C) infections; (D) provision of supportive care; (E) causes related to other cancers; (F) miscellaneous causes. Boxplots indicate median (horizontal line), 25th and 75th percentiles (lower and upper hinges), range of data values at most 1.5 * inter-quartile range from the 25th and 75th percentiles (whiskers), and individual outliers. P values for differences between patient groups were calculated by negative binomial regression. A zero-inflated negative binomial regression model was chosen if superior fit was indicated by the Vuong non-nested test. ns, not significant.
