# Supplementary material for: Colonization with multi-drug-resistant organisms negatively impacts survival in patients with non-small cell lung cancer
Source: PLoS One. 2020 Nov 25;15(11):e0242544. doi: 10.1371/journal.pone.0242544 (PMC7688109; doi:10.1371/journal.pone.0242544)
Supplement: S1 Table — (XLSX) [file pone.0242544.s001.xlsx]

## Sheet: MRE Zeit Final
Pat ID	Time to MRE	multiple MREs 0 = nein 1 = ja	Name andere MRE	type of MRE 1 = VRE 2 = 3MRGN 3 = ESBL 4 = MRSA	Bakterium	infektion vs kolonisation 1 = kolonisation 2 = Infektion	Ort des Nachweises 1 = rektal / stuhl 2 = Vaginal 3 = Urin 4 = Haut 5 = Sputum / Trachealsekret 6 = Nase	Ort Infektion 1 = gastroenteritis 2 = HWI 3 = Tracheobronchitis / Pneumonie X = unbekannt	antibiogrammgerechte T 0 = nein 1 = ja X = unbekannt, n/a	Neutropenie 0 = nein 1 = ja	nosokomial 1 = ambulant 2 = nosokomial	immunosuppression 0 = nein 1 = ja	MRE_Date 90d 0 = nein 1 = ja 2 = andere	Alter ED	Raucherstatus ED unbekannt = X Nie (<100cigs) = 1 aktiv = 2 Ex = 3	PY unbekannt = X	ECOG ED unbekannt = X	bekannte HIV 0 = nein 1 = 1	bekannter DM 0 = nein 1 = DM1 2 = DM2	Stadium ED UICC 7th 1 = IA 2 = IB 3 = IIA 4 = IIB 5 = IIIA 6 = IIIB 7 = IV	Histologie 1 = Adeno 2 = Platte 3 = other	Name other	T	N	M	EGFR X = unbekannt 0 = getestet, nein 1 = getestet, ja	KRAS X = unbekannt 0 = getestet, nein 1 = getestet, ja	ALK X = unbekannt 0 = getestet, nein 1 = getestet, ja	ROS1 X = unbekannt 0 = getestet, nein 1 = getestet, ja	BRAF X = unbekannt 0 = getestet, nein 1 = getestet, ja	Andere Mutation (MET, T790M)	Metastasen visceral X = unbekannt 0 = nein 1 = ja	Leber X = unbekannt 0 = nein 1 = ja	Lunge/Pleura X = unbekannt 0 = nein 1 = ja	NNR / kidney X = unbekannt 0 = nein 1 = ja	Haut / Weichteil X = unbekannt 0 = nein 1 = ja	Peritoneal / Perikardial	Other (spleen, pankreas, GIT) 0 = nein 1 = ja	Bone X = unbekannt 0 = nein 1 = ja	Brain / Eye X = unbekannt 0 = nein 1 = ja	primary Treatment BrainMet X = unknown 0 = keine spezf T 1 = OP 2 = Radiochirurgie 3 = WBRT	Kurative Therapie: OP X = unbekannt 1 = Lobektomie 2 = Bilobektomie 3 = atypisch / Segmentresektion 4 = Pneumektomie 5 = RCTX mit sekundärer OP	Kurativ CTX X = unbekannt 0 = keine 1 = Cisplatin Vinorelbin/Navelbine 2-4 Zyklen adjuvant 2 = Cisplatin Vinorelbin/Navelbine neoadjuvant 3 = Tri/Bimodale RCTX 4 = adjuvant Cis/Eto Pacli Gem 5 = neoadjuvant Cis/Eto Pacli Gem 6 other	Kurative Bestrahung X = unbekannt 0 = keine 1 = Radiochirurgie 2 = IF Nachbestrahlung 3 = Tri/Bimodale RCTX	1st line palliativ X = unknown 1 = Platin Pem 2 = Platin Gem/Pac 3 = Platindublette + VEGF 4 = TKI 5 = other	Tod X = UKN 1 = ja 2 = LTFU	OS	End of FollowUP 0 = LTFU 1 = relapse mortality 2 = non relapse mortality 3 = mortality NOS X = unknown	Stat Aufenthalt in d
002													0	75.3726	3	9	1	0	0	5	2		T2b	N1	M0	0	X	X	X	X	X	0	0	0	0	0	0	0	0	0	0	2	1	0	0	2	40.4055	0	22
003													0	69.9123	3	5	1	0	0	5	2		T3	N1	M0	0	X	X	X	X	X	0	0	0	0	0	0	0	0	0	0	2	1	0	0	2	50.8274	0	14
004													0	55.8	2	8	1	0	0	7	1		T2a	N0	M1a	1	X	X	X	X	X	1	0	1	0	0	0	0	0	0	0	0	0	0	3	1	15.9123	1	86
005	31	0		2	E. Coli	1	1	X	X	nein	1	0	1	80.611	2	6	0	0	2	5	2		T3	N1	M0	0	1	X	X	0	X	0	0	0	0	0	0	0	0	0	0	1	0	0	0	2	12.1973	0	23
006													0	63.8274	X	X	0	0	0	1	1		T1a	N0	M0	0	1	X	X	X	X	0	0	0	0	0	0	0	0	0	0	1	0	0	0	2	93.0411	0	12
007													0	72.7014	3	13	0	0	0	5	2		T4	N0	M0	0	X	X	X	X	X	0	0	0	0	0	0	0	0	0	0	1	0	0	0	2	90.3452	0	52
010													0	36.4795	2	19	0	0	0	7	1		UKN	N3	M1b	0	X	1	X	X	X	1	1	0	0	0	0	0	0	1	3	0	0	0	1	1	9.63288	1	67
011													0	63.8959	X	X	X	0	0	1	1		T1a	N0	M0	0	X	X	X	X	X	0	0	0	0	0	0	0	0	0	0	1	0	0	0	1	0.427397	2	16
012													0	61.9178	3	4	0	1	2	1	1		T1b	N0	M0	1	X	X	X	X	X	0	0	0	0	0	0	0	0	0	0	1	0	0	0	2	37.4795	0	75
013													0	65.9945	1		1	0	0	7	1		T1	N0	M1b	1	X	X	X	X	X	0	0	0	0	0	0	0	0	1	0	0	0	0	1	1	23.211	1	50
014													0	53.2384	3	4	0	0	0	4	2		T2	N1	M0	0	X	X	X	X	X	0	0	0	0	0	0	0	0	0	0	2	1	0	0	2	88.4384	0	22
015													0	54.8493	3	6	0	0	0	7	1		T3	N1	M1b	0	X	X	X	X	X	1	0	1	0	0	0	0	0	1	2	0	0	0	5	1	32.3507	1	32
016	-4	0		3	E. Coli	1	1	X	X	0	X	0	1	58.9973	3	3	1	0	0	2	2		T1b	N0	M0	0	X	X	X	X	X	0	0	0	0	0	0	0	0	0	0	1	0	0	0	2	33.7315	0	11
019													0	60.8027	X	X	1	0	0	7	2		T1b	N0	M1b	0	X	X	X	X	X	0	0	0	0	0	0	0	0	0	0	2	X	X	0	1	4.66849	1	18
020													0	69.1342	2	6	1	0	0	5	2		T4	N2	M0	0	X	X	X	X	X	0	0	0	0	0	0	0	0	0	0	4	0	0	0	1	0.920548	2	14
021													0	70.3781	2	75	1	0	0	7	1		T1b	N0	M1b	0	X	0	0	X	X	0	0	0	0	0	0	0	0	1	1	2	0	2	0	2	57.5342	0	35
022													0	83.6822	1		1	0	2	5	2		T4	N1	M0	0	X	X	X	X	X	0	0	0	0	0	0	0	0	0	0	1	0	0	0	1	7.2	1	24
023													0	-18.3753	X	X	0	0	0	5	1		T2	N2	M0	0	X	X	X	X	X	0	0	0	0	0	0	0	0	0	0	1	1	0	0	1	27.4521	1	35
027													0	71.4137	2	25	1	0	0	7	1		T4	N2	M1b	0	X	X	X	X	X	1	1	0	0	0	0	0	1	1	2	2	1	0	0	1	11.9014	1	61
029													0	28.7452	1		1	1	0	3	1		T1a	N1	M0	0	X	X	X	X	X	0	0	0	0	0	0	0	0	0	0	2	0	0	0	2	36.7562	0	39
030													0	61.6575	2	5	0	0	2	5	1		T3	N2	M0	0	X	X	X	X	X	0	0	0	0	0	0	0	0	0	0	0	0	0	3	1	2.4	1	18
031													0	63.6411	X	X	1	1	0	3	1		T2b	N0	M0	0	X	X	X	X	X	0	0	0	0	0	0	0	0	0	0	1	0	0	0	2	0.427397	0	15
032													0	67.2329	X	X	1	0	0	1	1		T1a	N0	M0	0	X	X	X	X	X	0	0	0	0	0	0	0	0	0	0	1	0	0	0	2	59.8685	0	5
033													0	66.9205	X	X	1	0	0	1	2		T1a	N0	M0	0	X	X	X	X	X	0	0	0	0	0	0	0	0	0	0	1	0	0	0	1	27.8795	2	147
034													0	68.0247	2	1		0	0	5	1		T3	N1	M0	0	0	X	0	0	X	0	0	0	0	0	0	0	0	0	0	2	1	1	0	2	40.6027	0	47
035													0	70.126	X	X	2	0	2	7	2		T3	N1	M1b	0	X	X	X	X	X	1	0	0	0	0	0	0	1	0	0	2	X	X	0	1	2.03836	1	50
036													0	56.5452	X	X	1	0	0	5	2		T3	N2	M0	0	X	X	X	X	X	0	0	0	0	0	0	0	0	0	0	4	0	0	0	1	2.36712	2	4
037													0	67.4986	2	3	2	0	0	7	1		T1a	N2	M1b	X	X	X	X	X	X	1	0	0	1	0	0	0	1	1	2	2	6	2	0	1	9.33699	1	48
038													0	34.9041	2	X	1	0	0	6	1		T4	N3	M0	0	X	1	X	X	X	0	0	0	0	0	0	0	0	0	0	2	4	2	0	1	17.4247	1	102
039													0	55.7644	3	4	0	0	0	7	1		T2b	N3	M1a	0	X	X	X	X	X	0	0	0	0	0	0	0	0	0	0	0	0	0	1	2	70.2575	0	23
041													0	64.5562	2	1	1	0	0	4	2		T3	N0	M0	0	X	X	X	X	X	0	0	0	0	0	0	0	0	0	0	2	0	0	0	2	0.789041	0	8
042													0	56.4932	X	X	X	0	0	X	2		T2-3	UKN	M0	0	X	X	X	X	X	0	0	0	0	0	0	0	0	0	0	0	3	2	0	2	4.2411	0	85
043													0	67.1699	3	4	1	0	1	5	2		T3	N2	M0	0	X	X	X	X	X	0	0	0	0	0	0	0	0	0	0	2	1	0	0	1	11.8356	1	64
044													0	57.7205	2	2	1	1	0	1	2		T1a	N0	M0	0	X	X	X	X	X	0	0	0	0	0	0	0	0	0	0	2	0	0	0	2	48.9863	0	62
047													0	57.4027	2	45	0	0	0	5	1		T3	N2	M0	1	X	X	X	X	X	0	0	0	0	0	0	0	0	0	0	0	3	3	0	1	7.2	1	64
049													0	67.2411	1		0	0	2	7	1		T4	N3	M1b	0	X	X	X	X	X	1	0	0	1	0	0	0	0	1	3	0	0	0	1	1	24.2301	1	86
050													0	44.7671	X	X	1	0	0	7	2		T4	N3	M1b	0	X	X	X	X	X	1	0	0	0	0	0	0	1	0	0	0	0	0	5	1	5.26027	2	117
051													0	62.8904	3	3	1	0	0	7	1		T1	N2	M1	1	X	X	X	X	X	1	0	0	1	0	0	0	1	0	0	0	0	0	x	1	14.5973	1	16
052													0	73.3288	X	X	1	0	0	7	1		T2b	N2	M1b	1	X	X	X	X	X	1	0	0	0	0	0	0	1	1	3	2	1	0	0	1	13.0192	1	55
053													0	71.5753	X	X	1	0	0	1	2		T1	N0	M0	0	X	X	X	X	X	0	0	0	0	0	0	0	0	0	0	2	0	0	0	1	50.8932	3	17
054													0	88.4959	3	X	2	0	0	3	2		T2b	N0	M0	0	X	X	X	X	X	0	0	0	0	0	0	0	0	0	0	2	0	0	0	1	6.50959	3	13
056													0	61.6219	2	8	0	0	0	7	2		T2a	N2	M1b	0	X	X	X	X	X	1	1	0	1	0	1	0	1	0	0	0	0	0	2	1	7.59452	1	34
057													0	80.0192	X	X	0	0	0	4	2		T3	N0	M0	0	X	X	X	X	X	0	0	0	0	0	0	0	0	0	0	2	0	0	0	1	0.690411	2	13
058													0	63.789	2	46	1	0	0	7	1		T2a	N0	M1b	0	X	X	X	X	X	0	0	0	0	0	0	0	0	1	2	2	1	0	0	1	24.526	1	19
059													0	65.8411	3	X	1	0	0	4	2		T3	N0	M0	0	X	X	X	X	X	0	0	0	0	0	0	0	0	0	0	2	1	0	0	2	61.3479	0	24
060													0	40.7863	1		0	0	0	7	1		T4	N1	M1a	0	X	0	X	X	X	1	0	1	0	0	0	0	0	0	0	0	0	0	1	1	3.87945	1	38
061													0	74.0986	2	4	1	0	0	7	1		T4	N2	M1a	0	X	X	X	X	X	1	0	1	0	0	0	0	0	0	0	0	0	0	1	1	11.7699	1
065													0	77.4575	2	6	1	0	0	7	1		T2a	N2	M1b	0	X	X	X	X	X	1	0	1	0	0	0	0	0	1	1	0	0	0	1	1	1.51233	2	42
066													0	69.4904	3	75	0	0	0	1	1		T1a	N0	M0	0	X	X	X	X	X	0	0	0	0	0	0	0	0	0	0	2	0	0	0	2	79.8575	0	10
067													0	83.1068	X	X	2	0	0	5	1		T3	N1	M0	0	X	X	X	X	X	0	0	0	0	0	0	0	0	0	0	X	0	0	0	1	27.7808	1	2
068													0	76.4822	X	X	2	0	0	2	2		T2a	N0	M0	0	X	X	X	X	X	0	0	0	0	0	0	0	0	0	0	2	0	0	0	1	17.0959	3	26
071													0	71.8575	X	X	2	0	0	1	2		T1a	N0	M0	0	X	X	X	X	X	0	0	0	0	0	0	0	0	0	0	2	0	0	0	1	10.126	3	20
074													0	62.8795	1		0	0	0	2	2		T2a	N2	M0	0	X	X	X	X	X	0	0	0	0	0	0	0	0	0	X	X	0	0	0	2	0.0657534	0	2
075													0	85.8575	2	X	1	0	0	5	2		T4	N0	M0	0	X	X	X	X	X	0	0	0	0	0	0	0	0	0	0	2	0	0	0	1	17.1288	3	15
076	0	1	E. Cloacea	3	Klebsiella P.	1	1	X	X	0	2	0	1	72.8685	3	8	2	0	2	7	1		T4	N3	M1b	0	X	X	X	X	X	1	1	0	1	0	0	0	1	1	0	0	0	0	1	1	0.0657534	2	11
077													0	70.3342	2	3	1	0	0	6	1		T4	N2	M0	1	X	X	X	X	X	0	0	0	0	0	0	0	0	0	0	2	0	0	0	1	19.5945	3	36
078													0	67.5233	3	2	0	0	0	7	1		T4	N0	M1a	1	X	0	X	X	X	1	1	1	0	0	0	0	0	0	0	0	0	0	4	1	22.1918	1	93
079													0	71.0164	X	X	1	0	2	5	1		T1a	N2	M0	0	X	X	X	X	X	0	0	0	0	0	0	0	0	0	X	2	0	0	0	2	69.7644	0	35
080													0	77.4685	2	1	1	0	0	3	3	Mukoepidermoid-Karzinom	T2a	N1	M0	0	X	X	X	X	X	0	0	0	0	0	0	0	0	0	0	1	0	1	0	1	7.00274	1	18
081													0	-4.89041	2	25	1	0	2	5	1		T3	N2	M0	0	X	X	X	X	X	0	0	0	0	0	0	0	0	0	0	2	2	0	0	1	9.53425	1	19
082													0	38.9973	2	15	2	0	0	7	1		T4	N2	M1b	0	X	0	X	X	X	1	1	1	1	0	0	0	0	0	0	0	0	0	1	1	9.76438	1	56
083													0	70.0685	2	1	1	0	0	5	2		T4	N0	M0	0	X	X	X	X	X	0	0	0	0	0	0	0	0	0	0	0	0	0	2	1	8.97534	3	22
084													0	64.5096	2	X	1	0	0	1	2		T1b	N0	M0	0	X	X	X	X	X	0	0	0	0	0	0	0	0	0	0	2	0	0	0	2	74.5315	0	22
085													0	61.2575	2	X	2	0	0	3	1		T2b	N0	M0	0	X	X	X	X	X	0	0	0	0	0	0	0	0	0	0	2	0	0	0	1	58.6192	3	26
086													0	53.2301	3	4	1	0	0	3	2		T1b	N0	M0	0	X	X	X	X	X	0	0	0	0	0	0	0	0	0	0	2	0	0	0	1	0.460274	3	9
087													0	36.9863	3	2	1	0	0	6	2		T4	N2	M0	0	0	X	X	X	X	0	0	0	0	0	0	0	0	0	0	4	0	0	0	1	13.3151	1	37
088													0	62.6959	2	45	2	0	2	7	2		T3	N3	M1b	0	X	X	X	X	X	1	0	1	0	0	0	0	1	0	0	0	0	0	2	1	20.2192	1	96
089													0	52.3699	2	75	1	0	0	7	1		T1b	N0	M1b	0	X	X	X	X	X	1	0	0	0	0	0	0	1	1	1	2	0	0	0	2	10.0932	0	43
090													0	83.3479	X	X	1	0	2	1	2		T1b	N0	M0	0	X	X	X	X	X	0	0	0	0	0	0	0	0	0	0	2	0	0	0	1	54.1151	3	10
091													0	86.3096	X	X	2	0	0	3	1		T2a	N1	M0	0	X	X	X	X	X	0	0	0	0	0	0	0	0	0	0	2	0	0	0	1	23.474	3	37
093													0	71.6877	2	X	1	1	0	1	1		T1b	N0	M0	0	X	X	X	X	X	0	0	0	0	0	0	0	0	0	0	2	0	0	0	1	22.9479	1	20
096													0	69.2575	3	1	1	0	2	7	1		T4	N0	M1a	1	1	X	X	X	X	1	0	1	0	0	0	0	0	0	0	0	0	0	1	1	38.4	1	47
097													0	64.5315	3	18	0	0	2	7	1		T2a	N3	M1b	0	X	X	X	X	X	1	0	1	1	0	0	0	0	1	2	0	0	0	1	1	14.8603	1	96
098													0	66.611	2	5	0	0	0	7	2		T3	N0	M1a	0	X	X	X	X	X	1	0	1	0	0	0	0	0	0	0	2	1	0	0	1	16.274	3	41
100													0	43.4438	1		2	0	0	7	1		T4	N3	M1b	0	X	X	X	X	X	1	1	1	0	0	0	0	0	1	3	0	0	0	2	1	3.84658	2	10
101													0	53.8137	3	22	1	0	0	5	1		T3	N1	M0	0	X	X	X	X	X	0	0	0	0	0	0	0	0	0	0	2	1	0	0	1	29.0301	1	14
102													0	73.4658	2	75	0	0	0	5	2		T3	N2	M0	0	X	X	X	X	X	0	0	0	0	0	0	0	0	0	0	2	1	0	0	1	28.8658	3	22
103													0	63.526	3	45	0	0	0	5	2		T3	N1	M0	0	X	X	X	X	X	0	0	0	0	0	0	0	0	0	0	4	4	0	0	1	10.4548	3	36
104													0	58.3479	2	2	0	0	2	7	2		T3	N2	M1b	0	X	X	X	X	X	0	0	0	0	0	0	0	0	1	2	X	X	X	X	1	5.55616	1	65
105													0	78.1288	1		0	0	0	2	1		T2a	N0	M0	0	X	X	X	X	X	0	0	0	0	0	0	0	0	0	0	2	0	0	0	2	56.4493	0	63
106													0	70.0822	2	6	1	0	0	4	2		T3	N0	M0	0	X	X	X	X	X	0	0	0	0	0	0	0	0	0	0	2	1	0	0	1	26.4986	1	103
107													0	69.9671	3	3	0	0	0	1	2		T1b	N0	M0	0	X	X	X	X	X	0	0	0	0	0	0	0	0	0	0	3	0	0	0	1	65.7863	3	13
108													0	58.5507	2	7	1	0	2	5	2		T2a	N2	M0	0	X	X	X	X	X	0	0	0	0	0	0	0	0	0	0	3	4	0	0	1	11.9342	1	52
109													0	64.3753	2	6	1	0	0	5	1		T2a	N2	M0	0	X	X	X	X	X	0	0	0	0	0	0	0	0	0	0	2	1	0	0	1	41.1945	2	69
110													0	61.2575	3	2	1	0	0	7	1		T2a	N1	M1b	0	1	0	X	X	X	0	0	0	0	0	0	0	0	1	1	2	1	0	0	1	37.8411	1	46
111													0	41.1041	3	3	0	1	0	4	1		T3	N0	M0	0	X	X	X	X	X	0	0	0	0	0	0	0	0	0	0	2	1	0	0	2	74.3342	0	13
112													0	63.1945	2	X	0	1	0	5	1		T3	N1	M0	0	X	X	X	X	X	0	0	0	0	0	0	0	0	0	0	4	0	0	0	1	10.9479	1	57
113													0	59.9233	3	45	0	0	0	1	1		T1b	N0	M0	0	X	X	X	X	X	0	0	0	0	0	0	0	0	0	0	2	0	0	0	2	70.7507	0	39
114													0	75.8411	3	4	2	0	0	7	1		T1a	N0	M1b	1	X	X	X	X	X	1	0	0	0	0	0	0	1	0	0	0	0	0	2	1	5.26027	1	94
115													0	80.2822	2	2	1	0	0	4	2		T3	N0	M0	0	X	X	X	X	X	0	0	0	0	0	0	0	0	0	X	2	0	0	0	1		3	24
116													0	80.5068	X	X	4	0	0	7	1		T2b	N0	M1b	0	X	X	X	X	X	0	0	0	0	0	0	0	0	0	0	2	1	1	0	1	1.38082	2	38
118													0	53.9671	2	28	1	0	0	6	1		T3	N3	M0	0	X	X	X	X	X	0	0	0	0	0	0	0	0	0	0	5	3	3	0	2	65.2603	0	30
120													0	70.3616	3	4	2	0	0	6	2		T4	N2	M0	0	X	X	X	X	X	0	0	0	0	0	0	0	0	0	0	X	0	0	0	1	4.27397	3	46
121													0	65.1918	2	6	1	0	0	6	2		T4	N2	M0	0	X	X	X	X	X	0	0	0	0	0	0	0	0	0	0	4	0	0	0	1	25.5452	3	17
122													0	68.1616	2	X	1	0	0	7	1		T1a	N1	M1a	0	X	X	X	X	X	1	0	1	0	0	0	0	0	0	0	2	1	0	0	1	3.28767	1	24
123													0	75.0356	2	5	2	0	0	5	1		T3	N2	M0	0	1	X	X	X	X	0	0	0	0	0	0	0	0	0	0	2	0	0	0	1	34.1589	2	20
124													0	66.2466	3	7		0	0	4	2		T3	N0	M0	0	X	X	X	X	X	0	0	0	0	0	0	0	0	0	0	1	2	0	0	2	63.0904	0	9
125	-2	0		3	E. Coli	1	1	x	x	0	1	0	1	62.8986	X	X	1	0	2	5	2		T3	N1	M0	0	X	X	X	X	X	0	0	0	0	0	0	0	0	0	X	2	0	0	0	2	0.164384	0	11
126													0	72.3397	X	X	1	0	0	1	2		T1b	N0	M0	0	X	X	X	X	X	0	0	0	0	0	0	0	0	0	X	X	0	0	0	1	35.9671	3	3
127													0	46.0603	3	3	0	0	0	1	1		T1a	N0	M0	0	X	X	X	X	X	0	0	0	0	0	0	0	0	0	0	3	0	0	0	2	49.7096	0	57
128													0	64.9014	2	X	1	0	0	7	1		T2b	N0	M1b	0	X	X	X	X	X	0	0	0	0	0	0	0	0	1	0	2	1	1	0	1	2.9589	1	25
129													0	76.2849	2	X	2	0	0	6	2		T3	N3	M0	0	X	X	X	X	X	0	0	0	0	0	0	0	0	0	0	2	0	0	0	1	42.4767	3	82
131													0	70.074	2	5	0	0	0	5	2		T1a	N2	M0	0	X	X	X	X	X	0	0	0	0	0	0	0	0	0	0	2	1	0	0	1	34.3233	1	71
132													0	51.4192	1		1	0	2	4	3	muzinöses bronchiolo-alveoläres Karzinom	T3	N0	M0	0	X	X	X	X	X	0	0	0	0	0	0	0	0	0	0	2	0	0	0	1	38.1041	1	90
133													0	61.1205	3	X	1	0	0	6	1		T4	N2	M0	0	X	X	X	X	X	0	0	0	0	0	0	0	0	0	0	2	5	0	0	2	45.9616	0	18
134	-7	1	3MRGN	3	E. Coli	1	1	X	X	0	1	0	1	74.8959	X	X	2	0	0	1	2		T1a	N0	M0	0	X	X	X	X	X	0	0	0	0	0	0	0	0	0	0	2	0	0	0	1	3.22192	2	77
135													0	64.8521	1		2	0	1	2	1		T2a	N0	M0	0	X	X	X	X	X	0	0	0	0	0	0	0	0	0	0	2	0	0	0	1	11.737	1	18
137													0	58.9233	2	4	1	0	0	3	1		T2b	N0	M0	0	X	X	X	X	X	0	0	0	0	0	0	0	0	0	0	2	1	0	0	1	10.5534	1	88
139													0	82.6493	3	3	2	0	0	7	2		T2b	N3	M1b	0	X	X	X	X	X	1	0	1	0	0	0	0	0	0	0	0	0	0	2	1	5.45753	1	13
140													0	68.7562	X	X	1	0	0	5	1		T3	N2	M0	0	X	X	X	X	X	0	0	0	0	0	0	0	0	0	0	2	4	2	0	1	13.7425	1	21
142													0	72.5342	1		1	0	0	7	1		T1a	N0	M1b	1	X	X	X	X	X	1	0	0	0	0	0	0	1	X	X	1	0	0	0	2	0.526027	0	8
143													0	74.2877	3	9	2	0	2	2	2		T2a	N0	M0	0	X	X	X	X	X	0	0	0	0	0	0	0	0	0	0	2	0	0	0	2	44.7781	0	20
144	-2	1	3MRGN	3	E. Coli	1	1	X	X	0	1	0	1	63.6603	1		1	0	0	5	1		T2b	N2	M0	0	X	X	X	X	X	0	0	0	0	0	0	0	0	0	0	2	1	0	0	1	16.2411	1	59
145													0	70.2904	3	2	1	0	2	4	2		T3	N0	M0	0	X	X	X	X	X	0	0	0	0	0	0	0	0	0	0	3	0	0	0	1	12.1315	1	29
147													0	73.9096	3	2	0	0	0	5	2		T3	N2	M0	1	X	X	X	X	X	0	0	0	0	0	0	0	0	0	0	2	1	0	0	1	24.2959	1	50
148													0	51.3288	2	5	1	0	2	6	2		T4	N2	M0	0	X	X	X	X	X	0	0	0	0	0	0	0	0	0	0	4	0	0	0	1	10.1918	1	27
149													0	62.5425	2	6	2	0	0	2	2		T2a	N0	M0	0	X	X	X	X	X	0	0	0	0	0	0	0	0	0	0	2	0	0	0	2		0	69
150													0	60.3863	3	8	1	0	0	7	2		T4	N2	M1b	0	X	X	X	X	X	1	0	0	1	0	0	0	0	0	0	0	0	0	2	1	5.95068	1	76
152	18	0		4	Staph. Aureus	1	6	X	X	0	2	0	1	64.1534	3	35	0	0	0	3	1		T1a	N1	M0	0	X	X	0	1	p53	0	0	0	0	0	0	0	0	0	0	2	1	0	0	2	48.1973	0	13
154	46	1	Klebsiella Pneumonia	3	E. Coli	1	1	X	X	0	1	0	1	73.3014	2	6	0	0	2	1	2		T1a	N0	M0	0	X	X	X	X	X	0	0	0	0	0	0	0	0	0	0	2	0	0	0	2	34.6521	0	19
156													0	74.1068	2	6	0	0	0	1	2		T1a	N0	M0	0	X	X	X	X	X	1	0	1	0	0	0	0	0	1	2	0	0	0	0	1	23.8356	1	47
157	3	0		3	E. Coli	1	1	x	x	0	1	0	1	59.5151	X	X	X	0	0	1	2		T1b	N0	M0	0	X	X	X	X	X	0	0	0	0	0	0	0	0	0	X	X	0	0	0	1	56.9425	3	4
160													0	55.8027	2	4	1	0	0	5	3	muzinöses bronchiolo-alveoläres Karzinom	T3	N0	M0	0	X	X	X	X	X	0	0	0	0	0	0	0	0	0	0	2	1	0	0	2	68.0219	0	20
164	-29	0		3	E. Coli	1	1	X	X	0	1	0	1	73.8575	3	5	1	0	2	5	2		T4	N1	M0	0	X	X	X	X	X	0	0	0	0	0	0	0	0	0	0	2	1	0	0	1	35.0795	1	39
165													0	61.4082	3	45	1	0	0	7	1		T2a	N2	M1b	0	X	X	X	X	X	1	0	0	0	0	0	0	1	1	2	0	0	0	1	1	3.68219	1	28
166													0	62.6329	X	X	2	0	0	1	2		T1a	N0	M0	0	X	X	X	X	X	0	0	0	0	0	0	0	0	0	0	3	0	0	0	1	32.4493	1	38
167													0	71.7342	2	6	1	0	0	7	1		T2a	N0	M1b	0	1	0	X	X	X	1	0	0	0	0	0	0	1	0	0	3	6	0	0	2	53.6219	0	34
168													0	75.2356	3	8	2	0	0	2	2		T2a	N0	M0	0	X	X	X	X	X	0	0	0	0	0	0	0	0	0	0	3	0	0	0	1	1.64384	3	21
169													0	64.4849	3	4	1	0	0	7	1		T4	N2	M1a	0	X	X	X	X	X	1	0	1	0	0	0	0	0	0	0	0	0	0	1	2	49.9397	0	38
170													0	73.5781	2	7	2	0	0	5	2		T3	N2	M0	0	X	X	X	X	X	0	0	0	0	0	0	0	0	0	0	2	5	0	0	1	14.4329	1	72
172													0	64.2986	3	4	1	0	0	1	1		T1a	N0	M0	0	X	X	X	X	X	0	0	0	0	0	0	0	0	0	0	2	0	0	0	2	28.9973	0	25
173	34	0		3	E. Coli	1	1	X	X	0	2	0	1	53.2329	2	6	0	0	0	5	1		T2b	N2	M0	0	X	X	X	X	X	0	0	0	0	0	0	0	0	0	0	2	1	0	0	2	7.00274	0	21
176	16	1	C Diff	3	E. Coli	1	1	X	X	0	2	0	1	72.9699	1		2	0	2	1	1		T1	N0	M0	0	X	1	X	X	X	0	0	0	0	0	0	0	0	0	0	2	0	0	0	2	36.3616	0	45
177													0	67.7562	X	X	1	0	0	1	1		T1b	N0	M0	0	X	X	X	X	X	0	0	0	0	0	0	0	0	0	0	2	0	0	0	2	53.8192	0	8
179													0	71.3781	X	X	1	0	0	2	2		T2a	N0	M0	0	X	X	X	X	X	0	0	0	0	0	0	0	0	0	0	2	1	0	0	1	12.789	1	28
180													0	71.0904	X	X	2	0	0	3	2		T2b	N0	M0	0	X	X	X	X	X	0	0	0	0	0	0	0	0	0	0	2	0	0	0	1	49.8411	2	32
184													0	77.6466	2	5	2	0	2	7	1		T3	N3	M1a	0	X	X	X	X	X	1	0	1	0	0	0	0	1	0	0	0	0	0	1	1	1.47945	1	3
186	-1	1	E. faecium	3	E. Coli	2	3	2	1	0	2	0	1	66.0137	3	1	2	0	2	5	2		T1a	N2	M0	0	1	X	X	X	p53	0	0	0	0	0	0	0	0	0	0	2	0	0	0	1	4.66849	1	64
188													0	52.7808	3	4	0	0	0	5	2		T3	N1	M0	0	X	X	X	X	X	0	0	0	0	0	0	0	0	0	0	2	1	0	0	2	37.7096	0	21
190													0	78.4959	3	1	1	0	2	1	1		T1b	N0	M0	0	X	X	X	X	X	0	0	0	0	0	0	0	0	0	0	2	0	0	0	2	39.7808	0	33
192													0	54.3726	3	11	2	1	0	7	1		T4	N3	M1b	0	X	X	X	X	X	1	0	0	1	0	0	0	0	0	0	0	0	0	1	1	8.41644	1	71
194													0	48.2	3	45	2	0	0	1	1		T1b	N0	M0	0	X	X	X	X	X	0	0	0	0	0	0	0	0	0	0	2	0	0	0	2	50.0712	0	14
195													0	60.9562	3	9	1	0	0	1	1		T1b	N0	M0	0	X	X	X	X	X	0	0	0	0	0	0	0	0	0	0	2	0	0	0	2	27.189	0	57
196													0	53.7315	2	3	2	0	0	7	3	großzelliges neurooendikrines Karzinom	T2a	N0	M1b	0	X	X	X	X	X	0	0	0	0	0	0	0	0	1	1	2	1	0	0	2	17.6877	0	49
197													0	57.6055	X	X	1	0	2	3	2		T2b	N0	M0	0	X	X	X	X	X	0	0	0	0	0	0	0	0	0	0	2	0	0	0	2	43.989	0	16
198													0	70.9753	2	5	1	0	0	7	2		T2a	N2	M1b	0	X	X	X	X	X	1	0	0	0	0	0	0	1	1	0	0	0	0	X	1	9.6	1	3
199													0	66.3726	X	X	2	0	0	1	2		T1b	N0	M0	0	X	X	X	X	X	0	0	0	0	0	0	0	0	0	0	3	0	0	0	2	26.2356	0	113
202													0	67.7123	2	X	1	0	0	4	2		T3	N0	M0	0	X	X	X	X	X	0	0	0	0	0	0	0	0	0	0	3	0	0	0	1	0.624658	1	22
203													0	57.9973	2	X	0	0	2	5	2		T3	N2	M0	0	X	X	X	X	X	0	0	0	0	0	0	0	0	0	0	2	5	0	0	2	42.2466	0	30
205	-2962	0		3	E. Coli	2	3	2	0	0	1	0	1	89.926	3	8	1	0	0	7	1		T4	N3	M1b	0	0	0	1	X	X	1	0	1	0	0	0	0	1	0	0	0	0	0	4	1	6.83836	2	33
208													0	69.7644	X	X	2	0	0	1	2		T1b	N0	M0	0	X	X	X	X	X	0	0	0	0	0	0	0	0	0	0	3	0	0	0	1	3.51781	2	21
214													0	63.5178	3	6	0	0	0	7	1		T2	N3	M1b	0	X	X	X	X	X	0	0	0	0	0	0	0	0	1	1	0	0	0	1	2	34.8822	0	45
215													0	54.9178	3	8	0	0	0	1	1		T1b	N0	M0	0	X	X	X	X	X	0	0	0	0	0	0	0	0	0	0	2	0	0	0	2	54.7397	0	13
216													0	74.9233	3	12	1	0	0	2	2		T2a	N0	M0	0	X	X	X	X	X	0	0	0	0	0	0	0	0	0	0	2	1	0	0	2	13.7753	0	20
217													0	58.0849	2	X	1	0	0	4	1		T3	N0	M0	0	X	X	X	X	X	0	0	0	0	0	0	0	0	0	0	2	0	0	0	2	41.1616	0	9
219													0	82.0822	X	X	1	0	2	3	1		T1a	N1	M0	0	X	0	X	X	X	0	0	0	0	0	0	0	0	0	0	2	0	0	0	1	3.3863	2	41
220													0	81.5918	2	6	2	0	0	4	1		T3	N0	M0	0	X	0	0	X	X	0	0	0	0	0	0	0	0	0	0	2	0	0	0	1	26.6301	3	20
221													0	66.7452	X	X	1	0	0	5	2		T1b	N2	M0	0	X	X	X	X	X	0	0	0	0	0	0	0	0	0	0	2	0	0	0	2	62.3671	0	11
222													0	75.1699	X	X	2	0	2	7	1		T2b	N1	M1b	0	X	X	X	X	X	1	0	0	0	0	0	0	1	0	0	0	0	0	X	1	1.31507	1	32
223													0	73.063	2	X	1	0	0	1	1		T1b	N0	M0	0	X	X	X	X	X	0	0	0	0	0	0	0	0	0	0	2	0	0	0	1	2.66301	3	14
224													0	70.1178	X	X	1	0	2	6	2		T3	N3	M0	0	X	X	X	X	X	0	0	0	0	0	0	0	0	0	X	2	0	0	0	1	10.9151	1	18
225													0	77.4438	X	X	2	0	0	1	2		T1b	N0	M0	0	X	X	X	X	X	0	0	0	0	0	0	0	0	0	0	2	0	0	0	1	20.1863	3	45
226													0	73.074	X	X	1	0	0	4	3	muzinöses bronchiolo-alveoläres Karzinom	T3	N0	M0	0	X	X	X	X	X	0	0	0	0	0	0	0	0	0	0	2	0	0	0	2	57.9616	0	7
227													0	78.1918	3	25	1	0	0	5	2		T2a	N2	M0	0	X	X	X	X	X	0	0	0	0	0	0	0	0	0	0	2	0	2	0	1	40.2411	1	70
228													0	60.1452	3	35		0	2	4	2		T3	N0	M0	0	X	X	X	X	X	0	0	0	0	0	0	0	0	0	0	2	0	0	0	1	12.6904	3	23
229													0	68.3671	X	X	2	0	0	1	2		T1b	N0	M0	0	X	X	X	X	X	0	0	0	0	0	0	0	0	0	0	2	0	0	0	1	24.4932	2	80
230													0	72.3507	X	X	1	0	0	4	2		T3	N0	M0	0	X	X	X	X	X	0	0	0	0	0	0	0	0	0	0	2	0	0	0	2	52.9973	0	30
231													0	50.8603	3	6	0	0	0	4	1		T2b	N1	M0	0	X	X	X	X	X	0	0	0	0	0	0	0	0	0	0	2	1	0	0	2	37.0192	0	31
232													0	78.7342	2	6	1	0	0	7	1		T1b	N0	M1b	0	X	X	X	X	X	1	0	1	0	0	0	0	0	0	0	2	1	0	0	2	33.7315	0	7
241													0	66.9315	2	4	1	0	2	5	2		T3	N1	M0	0	X	X	X	X	X	0	0	0	0	0	0	0	0	0	0	2	1	2	0	2	52.7014	0	28
242													0	56.8603	2	4	1	0	0	6	2		T4	N1	M0	0	X	X	X	X	X	0	0	0	0	0	0	0	0	0	0	2	1	0	0	2	55.8575	0	45
243	36	1	Klebsiella oxytoca	3	E. Coli	1	1	X	X	0	2	0	1	73.8329	2	125	1	0	0	7	2		T4	N2	M1a	0	X	X	X	X	X	1	0	0	1	0	0	0	0	0	0	0	0	0	1	1	1.67671	2	33
244													0	65.137	2	75	3	0	2	7	1		T3	N1	M1b	0	X	X	X	X	X	1	0	0	0	0	0	0	0	1	0	0	0	0	1	1	1.01918	2	36
245													0	79.8767	X	X	1	0	0	5	1		T3	N1	M0	0	X	X	X	X	X	0	0	0	0	0	0	0	0	0	0	2	0	0	0	1	1.08493	2	36
247													0	42.3479	X	X	1	0	0	5	2		T4	N1	M0	0	X	X	X	X	X	0	0	0	0	0	0	0	0	0	0	4	0	0	0	1	1.31507	3	9
250													0	67.1452	3	4	1	0	0	1	1		T1b	N0	M0	0	X	X	X	X	X	0	0	0	0	0	0	0	0	0	0	2	0	0	0	2	48.8219	0	25
251													0	57.4712	2	4	1	0	0	7	1		T4	N3	M1b	0	X	0	0	X	X	1	0	0	0	0	0	0	1	1	3	0	0	0	1	1	1.38082	1	23
252													0	81.7096	3	3	0	0	2	3	2		T2a	N1	M0	0	X	X	X	X	X	0	0	0	0	0	0	0	0	0	0	2	0	0	0	2	45.8301	0	15
254													0	70.2932	3	75	1	1	2	1	1		T1b	N0	M0	0	X	X	X	X	X	0	0	0	0	0	0	0	0	0	0	2	0	0	0	1	38.5315	3	18
255													0	62.4438	X	X	1	0	0	1	2		T1b	N0	M0	0	X	X	X	X	X	0	0	0	0	0	0	0	0	0	0	2	0	0	0	2	47.4082	0	42
256													0	55.6466	3	15	1	0	0	7	1		T3	N3	M1b	0	0	0	X	X	MET	1	0	1	1	0	0	0	0	1	3	0	0	0	1	1	12.6247	1	79
257													0	82.7589	X	X	1	0	0	5	1		T3	N2	M0	0	X	0	0	X	X	0	0	0	0	0	0	0	0	0	0	2	6	0	0	1	6.80548	1	34
258													0	73.8603	3	55	1	0	0	1	2		T1a	N0	M0	0	X	X	X	X	X	0	0	0	0	0	0	0	0	0	0	3	0	0	0	2	19.4301	0	12
259													0	72.3014	X	X	0	0	2	2	1		T2a	N0	M0	0	X	X	X	X	X	0	0	0	0	0	0	0	0	0	0	2	0	0	0	2	36.8548	0	14
261	5	0		1	E. faecium	1	1	X	X	0	2	0	1	58.2247	2	44	4	0	0	7	2		T2b	N1	M1a	0	X	X	X	X	X	1	0	0	0	0	1	0	0	0	0	2	1	1	0	1	18.9041	2	49
262													0	48.7945	2	25	0	0	0	7	1		T2a	N2	M1b	0	X	X	X	X	X	1	1	0	1	0	0	0	0	1	2	0	0	0	1	1	7.72603	1	7
264													0	66.9945	3	4	2	0	0	5	1		T1b	N2	M0	0	X	0	0	X	X	0	0	0	0	0	0	0	0	0	0	2	1	0	0	1	23.8685	1	64
265													0	61.2027	X	X	1	0	0	7	2		T4	N3	M1a	0	X	X	X	X	X	1	0	1	0	0	0	1	0	1	3	0	0	0	2	1	2.26849	1	38
267													0	82.1562	3	X	1	0	0	7	1		T4	N1	M1b	0	X	X	X	X	X	1	1	0	0	0	0	0	0	0	0	0	0	0	x	1	4.33973	1	17
270													0	65.0192	X	X	1	0	0	4	2		T3	N0	M0	0	X	X	X	X	X	0	0	0	0	0	0	0	0	0	0	2	0	0	0	1	5.26027	3	14
271													0	72.9479	X	X	3	0	0	7	1		T4	N2	M1b	0	X	X	X	X	X	1	1	1	1	0	0	1	1	0	0	0	0	0	1	1	5.42466	1	3
273													0	70.7644	2	1	0	0	0	5	2		T1a	N2	M0	0	X	X	X	X	X	0	0	0	0	0	0	0	0	0	0	2	1	0	0	1	14.8603	1	33
274													0	71.4219	2	55	1	0	0	5	2		T2b	N2	M0	0	X	X	X	X	X	0	0	0	0	0	0	0	0	0	0	2	5	0	0	1	7.03562	2	36
276													0	61.1479	3	2	2	0	0	6	1		T3	N3	M0	0	X	X	X	X	MET	0	0	0	0	0	0	0	0	0	0	0	3	3	0	2	42.6082	0	34
277	-1	1	Klebsiella Pneumonia	3	E. Coli	1	1	X	X	0	1	0	1	60.4603	2	X	1	0	2	5	1		Tab	N2	M0	0	X	X	X	X	X	0	0	0	0	0	0	0	0	0	X	3	0	0	0	1	4.07671	1	14
280	-1018	0		3	E. Coli	1	1	x	x	0	1	0	1	61.0274	2	4	1	0	2	7	2		T3	N1	M1a	0	X	X	X	X	X	1	0	1	0	0	0	0	0	0	0	0	0	0	1	1	2.07123	2	11
281													0	50.1781	2	3	0	0	0	7	1		T1a	N1	M1b	0	X	X	X	X	MET	1	0	1	0	0	0	0	1	1	1	2	1	0	0	1	26.8274	1	42
284													0	57.8849	1		2	0	0	7	2		T4	N3	M1b	1	X	X	X	X	X	1	0	0	0	0	0	0	1	0	0	0	0	0	2	1	8.81096	2	66
288													0	72.789	3	1	0	0	0	7	2		T3	N2	M1b	0	X	X	X	X	X	1	0	0	0	0	0	0	1	0	0	2	1	0	0	1	15.8466	1	10
289													0	48.6247	2	35	1	0	0	7	1		T2a	N3	M1b	0	1	x	x	x	X	1	0	0	1	0	0	0	0	1	3	0	0	0	1	1	5.7863	2	38
291													0	58.9808	2	X	1	0	0	5	2		T4	N0	M0	0	X	X	X	X	X	0	0	0	0	0	0	0	0	0	0	0	0	0	2	1	14.4329	1	76
293													0	58.9589	2	1	0	0	0	7	1		T4	N3	M1b	0	X	X	X	X	X	1	0	0	1	1	0	0	1	0	0	0	0	0	2	1	3.74795	1	18
295	35	0		1	E. Faecium	2	1	X	X	0	2	0	1	72.5397	2	X	2	0	2	7	2		T3	N2	M1b	0	X	X	X	X	X	1	0	0	0	0	0	0	1	0	0	0	0	0	2	1	6.6411	1	52
296													0	60.6904	1		0	0	0	2	1		T2a	N0	M0	0	0	0	1	X	X	0	0	0	0	0	0	0	0	0	0	3	0	0	0	2	38.5973	0	8
297													0	54.211	2	1	0	0	0	7	1		T2b	N3	M1b	0	X	X	X	X	X	1	1	1	0	0	0	0	0	0	0	0	0	0	1	1	14.4	1	31
298													0	64.2055	2	16	1	0	0	7	1		T3	N3	M1a	0	X	X	X	X	p53	1	0	1	0	0	0	0	0	1	0	0	0	0	1	1	7.46301	1	25
299													0	59.0986	3	3	0	0	0	1	1		T1a	N0	M0	0	X	X	X	X	X	0	0	0	0	0	0	0	0	0	0	2	0	0	0	2	31.0685	0	30
300													0	54.2685	2	76	1	0	0	4	1		T3	N0	M0	0	X	X	X	X	X	0	0	0	0	0	0	0	0	0	0	2	1	0	0	2	35.8356	0	12
301													0	64.8548	3	8	1	0	0	6	1		T2a	N3	M0	0	X	X	X	X	MET	0	0	0	0	0	0	0	0	0	0	0	0	0	0	1	17.1616	1	44
303													0	78.5041	3	4	2	0	0	3	2		T1b	N1	M0	0	X	X	X	X	X	0	0	0	0	0	0	0	0	0	0	2	1	0	0	2	46.4548	0	18
304													0	70.9726	3	7.5	1	0	0	7	1		T4	N3	M1b	0	X	X	X	X	X	1	1	1	0	0	0	0	1	0	0	0	0	0	1	1	9.6	2	44
305													0	68.011	3	1	0	0	0	5	1		T2a	N2	M0	0	X	X	X	X	X	0	0	0	0	0	0	0	0	0	0	2	1	0	0	2	41.4247	0	40
308													0	81.6027	3	4	1	0	0	4	1		T3	N0	M0	0	X	X	X	X	X	0	0	0	0	0	0	0	0	0	0	2	0	0	0	1	16.5041	1	11
311													0	72.6986	X	X	0	0	2	2	1		T2a	N0	M0	0	X	X	X	X	X	0	0	0	0	0	0	0	0	0	0	2	X	0	0	2	19.2	0	16
314													0	54.0795	2	45	1	0	0	7	1		T1a	N0	M1b	0	X	X	X	X	X	0	0	0	0	0	0	0	0	1	1	2	1	0	0	2	7.43014	0	29
315													0	74.3644	X	X	1	0	0	1	1		T1b	N0	M0	0	X	X	X	X	X	0	0	0	0	0	0	0	0	0	0	2	0	0	0	2	0.230137	0	11
317													0	71.0137	3	3	1	0	0	1	1		T1a	N0	M0	0	X	X	X	X	X	0	0	0	0	0	0	0	0	0	0	2	0	0	0	2	28.7342	0	6
322													0	63.5808	2	8	1	0	0	6	2		T4	N2	M0	0	X	X	X	X	X	0	0	0	0	0	0	0	0	0	0	4	0	0	0	1	1.64384	2	11
323													0	50.326	3	36	1	0	0	7	1		T2a	N3	M1b	0	X	X	0	0	X	1	0	0	1	0	0	0	0	0	0	0	0	0	5	1	4.17534	1	13
324													0	61.1589	X	X	1	0	0	7	1		T4	N1	M1a	0	X	0	X	X	X	1	0	1	0	0	0	0	1	0	0	0	0	0	1	1	23.9014	1	36
328													0	66.537	3	5	1	0	0	7	1		T1b	N3	M1b	0	X	0	1	X	X	1	0	1	0	0	0	0	0	1	3	0	0	0	4	1	29.589	1	23
329													0	60.0877	X	X	1	0	0	5	2		T4	N0	M0	0	X	X	X	X	X	0	0	0	0	0	0	0	0	0	0	2	0	0	0	2	30.0493	0	13
330													0	60.3041	3	1	0	0	0	5	1		T2a	N2	M0	0	X	X	X	X	X	0	0	0	0	0	0	0	0	0	0	2	2	2	0	2	36.5589	0	29
332	29	1	C DIff	1	E. Faecium	1	1	X	X	0	2	0	1	79.1836	3	2	2	0	0	7	2		T3	N2	M1b	0	X	X	X	X	X	1	0	1	0	0	0	0	1	0	0	0	0	0	2	1	1.34795	2	29
334													0	58.6658	3	6	1	0	0	5	2		T3	N2	M0	0	X	X	X	X	X	0	0	0	0	0	0	0	0	0	0	5	3	3	0	2	31.0356	0	24
336													0	76.0055	X	X	1	0	2	1	1		T1a	N0	M0	0	X	X	X	X	X	0	0	0	0	0	0	0	0	0	0	2	0	0	0	2	34.1589	0	12
339													0	83.674	3	4	1	0	0	1	2		T1a	N0	M0	0	X	X	X	X	X	0	0	0	0	0	0	0	0	0	0	3	0	0	0	2	22.0274	0	13
340	-13	1	E faecium	2	E. Coli	1	1	X	X	X	1	0	1	71.1041	2	4	1	0	0	4	2		T3	N0	M0	0	X	X	X	X	X	0	0	0	0	0	0	0	0	0	0	2	1	0	0	1	2.4	2	41
344													0	55.7068	2	4	1	0	2	7	1		T3	N2	M1b	0	1		X	X	p53	1	0	0	0	1	0	1	0	1	2	0	0	0	1	1	3.41918	1	34
346													0	90.0603	X	X	1	0	0	7	2		T4	N3	M1a	0	X	X	X	X	X	1	0	1	0	0	0	0	0	0	0	0	0	0	1	1	6.08219	1	15
350													0	61.7123	3	4	1	0	0	1	2		T1a	N0	M0	0	X	X	X	X	X	0	0	0	0	0	0	0	0	0	0	2	0	0	0	2	32.9096	0	6
352													0	49.0384	3	3	1	0	0	3	1		T1b	N1	M0	0	X	X	X	X	X	0	0	0	0	0	0	0	0	0	0	2	1	0	0	2	33.0082	0	9
356													0	54.2712	2	3	0	0	0	7	1		T2b	N2	M1b	0	1	X	X	X	PIK3CA positiv	1	1	0	0	0	0	0	0	1	2	2	1	0	0	1	7.72603	1	22
357													0	69.9205	3	X	0	0	0	7	1		T4	N2	M1b	0	X	X	X	X	X	1	1	0	0	0	0	0	1	1	2	0	0	0	1	1	6.57534	1
358													0	80.7342	2	61	1	0	0	7	2		T3	N2	M1a	0	X	X	X	X	X	1	0	1	0	0	0	0	0	0	0	X	X	X	X	1	10.3562	1	43
360													0	65.2384	3	1	1	0	2	5	1		T4	N1	M0	0	X	X	X	X	X	0	0	0	0	0	0	0	0	0	0	0	0	0	1	1	1.80822	1	6
362													0	73.4027	3	4	1	0	2	7	2		T4	N2	M1b	0	X	X	X	X	X	0	0	0	0	0	0	0	0	1	1	0	0	0	2	2	36.5918	0	19
365													0	64.4904	3	35	0	0	0	4	1		T2b	N1	M0	0	X	X	X	X	X	0	0	0	0	0	0	0	0	0	0	2	1	0	0	1	4.63562	1	42
368													0	59.5178	3	5	1	0	0	1	2		T1a	N0	M0	0	X	X	X	X	X	0	0	0	0	0	0	0	0	0	0	3	0	0	0	2	31.6932	0	45
371													0	67.2082	3	4	2	0	0	7	1		T2a	N3	M1b	0	X	0	X	X	X	1	1	0	0	0	0	1	1	1	0	0	0	0	1	1	1.61096	1	14
372													0	70.926	3	X	1	0	0	6	1		T2b	N3	M0	0	X	X	X	X	X	0	0	0	0	0	0	0	0	0	0	5	3	3	0	1	16.3068	1	42
375													0	77.7589	3	4	1	0	2	5	1		T1a	N2	M0	0	X	X	X	X	X	0	0	0	0	0	0	0	0	0	0	2	0	0	0	1	5.75342	1	84
377													0	79.5096	1		1	0	0	2	3	Nichtmuzinöses Bronchioloalveoläres Karzinom	T2a	N0	M0	1	X	X	X	X	X	0	0	0	0	0	0	0	0	0	0	0	0	1	0	2	33.2712	0	4
382													0	69.0932	X	X	2	0	0	7	1		T1a	N0	M1b	0	X	X	X	X	X	1	0	0	0	0	0	0	1	0	0	0	0	0	X	1	0.657534	3	3
385													0	48.1808	2	3	0	0	0	1	1		T1b	N0	M0	0	X	X	X	X	X	0	0	0	0	0	0	0	0	0	0	2	0	0	0	2	14.926	0	5
390													0	47.6411	3	3	0	0	0	6	1		T2b	N3	M0	0	X	0	X	X	X	0	0	0	0	0	0	0	0	0	0	0	0	0	2	2	3.74795	0	0
392													0	56.1726	3	5	1	0	0	6	1		T1a	N3	M0	0	X	X	X	X	X	0	0	0	0	0	0	0	0	0	0	0	0	0	2	1	5.45753	1	35
393													0	35.0986	2	23	1	0	0	7	3	Großzelliges neuroendokrines Karzinom	T1b	N2	M1b	0	0	X	X	X	X	0	0	0	0	0	0	0	0	1	1	2	5	0	0	1	8.6137	1	53
394													0	72.1644	1		1	0	0	7	1		T4	N3	M1b	0	X	0	1	X	X	1	0	0	0	0	1	0	1	0	0	0	0	0	4	1	12.0329	1	6
395													0	69.0384	1		1	0	0	2	1		T2a	N0	M0	1	X	X	X	X	X	0	0	0	0	0	0	0	0	0	0	2	1	0	0	2	33.074	0	32
396													0	70.0247	3	4	1	0	2	7	1		T4	N3	M1b	0	0	0	0	1	x	1	0	0	0	0	1	0	1	1	3	0	0	0	1	1	2.43288	1	45
399	46	0		2	Klebsiella P.	2	3	2	1	0	2	0	1	73.2548	3	6	1	0	2	7	1		T4	N2	M1b	0	X	0	X	X	X	1	0	1	0	0	0	0	0	0	0	0	0	0	1	1	7.66027	1	24
400													0	72.211	2	5	1	0	0	5	2		T2a	N2	M0	0	X	X	X	X	X	0	0	0	0	0	0	0	0	0	0	2	0	0	0	2	3.71507	0	33
402													0	51.3452	2	3	0	0	0	5	2		T3	N2	M0	0	X	X	X	X	X	0	0	0	0	0	0	0	0	0	0	5	3	3	0	1	6.2137	1	31
404													0	77.0082	2	X	X	0	0	1	2		T1a	N0	M0	0	X	X	X	X	X	0	0	0	0	0	0	0	0	0	0	X	0	0	0	2	0.821918	0	26
407													0	44.5781	2	2	1	0	0	7	1		T1a	N2	M1b	0	1	X	X	X	X	0	0	0	0	0	0	0	0	1	3	2	1	0	0	1	4.3726	1	30
409													0	53.9096	3	35		0	0	7	1		T3	N3	M1b	0	0	0	0	X	MET	1	0	0	0	0	0	0	1	1	1	0	0	0	1	1	13.3151	1	56
415													0	61.9699	3	3	0	0	0	3	2		T2b	N0	M0	0	X	X	X	X	X	0	0	0	0	0	0	0	0	0	0	2	1	0	0	2	29.2274	0	21
418													0	78.1342	1		1	0	0	2	1		T2a	N0	M0	0	X	X	X	X	X	0	0	0	0	0	0	0	0	0	0	2	0	0	0	2	26.5644	0	20
420	64	0		1	E. faecium	1	1	X	X	0	2	0	1	69.8411	X	X	1	0	2	7	1		T3	N2	M1b	0	X	0	X	X	X	1	0	0	1	0	0	0	1	0	0	0	0	0	2	1	2.16986	2	19
421													0	61.789	2	X	1	0	0	6	2		T4	N2	M0	0	X	X	X	X	X	0	0	0	0	0	0	0	0	0	0	4	0	0	0	1	10.4548	1	62
422													0	71.6384	3	6	1	0	0	7	1		T4	N3	M1b	0	0	0	X	X		1	0	1	1	0	1	0	1	0	0	0	0	0	1	2	29.1616	0	23
423													0	66.7315	3	4	0	0	0	5	1		T2a	N2	M0	0	0	0	0	0	p53	0	0	0	0	0	0	0	0	0	0	2	1	0	0	2	30.3123	0	62
424													0	72.9397	3	5	1	0	0	4	1		T3	N0	M0	0	0	X	X	X	X	0	0	0	0	0	0	0	0	0	0	2	0	0	0	1	8.08767	1	18
426													0	68.4986	3	8	1	0	0	2	2		T2a	N0	M0	0	X	X	X	X	X	0	0	0	0	0	0	0	0	0	0	2	0	0	0	2	16.4055	0	24
427													0	51.8384	3	3	0	0	0	7	1		T4	N3	M1a	0	1	0	X	X	X	1	0	1	0	0	0	0	1	1	3	0	0	0	1	1	25.5123	1	23
430													0	53.4603	X	X	0	0	0	7	3	Azinuszellkarzinom	T3	N0	M1b	0	X	X	X	X	X	1	0	0	0	0	0	0	1	0	0	0	0	0	5	2	2.00548	0	9
431													0	69.5973	3	3	1	0	2	2	1		T2a	N0	M0	0	X	X	X	X	X	0	0	0	0	0	0	0	0	0	0	2	0	0	0	2	23.1452	0	24
432													0	61.1836	X	X	1	0	0	1	1		T1a	N0	M0	0	X	X	X	X	X	0	0	0	0	0	0	0	0	0	0	2	0	0	0	2	0.0986301	0	5
433													0	76.7671	2	3	1	0	0	7	1		T3	N2	M1b	0	1	0	X	0	X	1	1	0	0	0	0	0	1	0	0	0	0	0	2	2	26.926	0	22
435													0	62.5562	2	1	0	0	2	7	1		T4	N2	M1b	0	1	0	X	X	p53	1	1	0	1	1	0	0	1	1	3	0	0	0	1	1	8.12055	1	7
436													0	67.6877	3	45	1	0	0	5	1		T1a	N2	M0	0	X	X	X	X	X	0	0	0	0	0	0	0	0	0	0	3	1	0	0	2	27.2877	0	15
439													0	78.2438	2	4	2	0	0	5	1		T3	N2	M0	0	X	X	X	X	X	0	0	0	0	0	0	0	0	0	0	2	0	0	0	1	8.05479	1	40
442													0	76.0575	3	7	0	0	0	3	1		T2b	N0	M0	0	X	X	X	X	X	0	0	0	0	0	0	0	0	0	0	2	1	0	0	2	26.6301	0	22
443													0	67.5397	2	6	1	0	2	3	2		T2a	N1	M0	0	X	X	X	X	X	0	0	0	0	0	0	0	0	0	0	2	1	0	0	2	25.1507	0	268
445													0	66.0767	2	22	1	0	2	7	1		T3	N2	M1b	0	0	0	X	X	X	0	0	0	0	0	0	0	0	1	1	0	0	0	1	2	27.6493	0	33
447													0	54.6658	2	6	1	0	0	6	1		T4	N2	M0	0	X	X	X	X	X	0	0	0	0	0	0	0	0	0	0	5	3	3	0	2	0.591781	0	22
448													0	68.8849	3	1	0	0	0	5	2		T3	N1	M0	0	X	X	X	X	X	0	0	0	0	0	0	0	0	0	X	2	0	0	0	2	1.21644	0	20
449													0	58.0219	X	X	0	0	0	7	1		T3	N0	M1b	0	0	0	X	X	p53	1	0	1	0	0	0	0	0	0	0	0	0	0	1	2	21.4356	0	17
450													0	79.9562	X	X	1	0	0	3	2		T2b	N0	M0	0	X	X	X	X	X	0	0	0	0	0	0	0	0	0	0	2	0	0	0	2	0.427397	0	16
451													0	62.6438	2	45	2	0	0	7	1		T4	N3	M1b	0	0	0	0	X	MET	1	1	1	0	0	0	0	1	1	0	0	0	0	1	1	8.44932	1	79
452													0	74.1753	3	3	1	0	0	5	2		T3	N2	M0	0	X	X	X	X	X	0	0	0	0	0	0	0	0	0	X	2	0	0	0	2	1.18356	0	21
453													0	62.1397	X	X	1	0	0	1	2		T1b	N0	M0	0	X	X	X	X	X	0	0	0	0	0	0	0	0	0	0	3	0	0	0	2	0.131507	0	9
454													0	62.863	3	3	1	0	0	4	1		T3	N0	M0	0	X	X	X	X	X	0	0	0	0	0	0	0	0	0	0	2	1	0	0	2	22.4548	0	23
455													0	73.0384	X	X	1	0	0	2	2		T2a	N0	M0	0	X	X	X	X	X	0	0	0	0	0	0	0	0	0	0	2	0	0	0	2	0.986301	0	7
458													0	58.7315	3	7	1	0	0	4	2		T3	N0	M0	0	X	X	X	X	X	0	0	0	0	0	0	0	0	0	0	2	1	2	0	2	24.8219	0	40
462													0	47.8356	X	X	0	0	2	3	2		T1b	N1	M0	0	X	X	X	X	X	0	0	0	0	0	0	0	0	0	0	2	0	0	0	2	0.230137	0	15
463													0	68.7507	X	X	1	0	0	7	2		T4	N2	M1b	0	X	X	X	X	X	1	0	0	0	0	0	0	1	0	0	0	0	0	2	1	3.15616	1	14
464	-1	0		3	E. coli	1	1	X	X	0	1	0	1	68.6219	X	X	1	0	0	1	1		T1a	N0	M0	0	X	X	X	X	X	0	0	0	0	0	0	0	0	0	0	3	0	0	0	2	0.328767	0	9
465													0	75.5918	3	2	1	0	0	7	1		T4	N3	M1a	0	X	0	X	X	X	1	0	1	0	0	0	0	0	1	2	0	0	0	1	2	17.4575	0	36
467													0	74.2438	X	X	1	0	0	1	2		T1b	N0	M0	0	X	X	X	X	X	0	0	0	0	0	0	0	0	0	0	2	0	0	0	2	0.526027	0	22
468													0	66.8	2	3	X	0	0	3	2		T2a	N0	M0	0	X	X	X	X	X	0	0	0	0	0	0	0	0	0	0	2	1	0	0	2	96.8219	0	58
469													0	64.4603	2	3	X	0	0	7	1		T3	N0	M1b	0	1	X	X	X	X	1	0	1	0	0	0	0	0	1	2	2	6	0	0	1	40.6685	1	39
470													0	75.7945	3	35	0	0	0	7	1		T2a	N0	M1b	0	X	X	X	X	X	0	0	0	0	0	0	0	0	1	2	2	0	0	0	2	2.00548	0	20
471													0	66.9781	3	5	0	0	0	5	2		T4	N1	M0	0	X	X	X	X	X	0	0	0	0	0	0	0	0	0	0	2	1	2	0	2	21.5342	0	39
[truncated: 21 more columns]

## Sheet: MREs Liste
	Number	Time To MRE	MRE	Acylureidopenicilline	3./4. Gen Cephalosporine	Fluorchinolone	Carbapeneme	Aminoglykoside	Folatpathway Inh.	Glycylcycline (Tigecyclin)	Glykopeptide	add. R!	Nachweis	Kat Tax	Kat MDR
	1	-2962	E. Coli	R	R	R	S						Urine		MDR
	2	-1018	E. Coli	R	R	R	S	R				Gentamicin, Tobramicin	rektal		MDR
	3	-29	E. Coli	R	R	S	S		R			Cotrimoxacol	rektal		MDR
	4	-13	E. Coli	R	R	R	S						rektal		MDR
	5	-7	E. Coli	R	R	R	S		R			Cotrimoxacol	rektal		XDR
	6	-4	E. Coli	R	R	S	S		R	R		Gentamicin, Tobramicin, Cotrimoxazol, Fosfomycin	rektal		XDR
	7	-2	E. Coli	R	R	S	S		R			Cotrimoxaczol	rektal		MDR
	8	-2	E. Coli	R	R	R	S						rektal		MDR
	9	-1	E. Coli	R	R	R	S	R	R			Cotrimoxacol, Gentamicin	urine		XDR
	10	-1	Klebsiella P.	R	R	R	S	R	R	R		Gentamicin, Tigezyclin, Cotrimoxzol	rektal		XDR
	11	-1	E. coli	R	R	R	S						rektal		MDR
	12	0	Klebsiella P.	R	R	R	S	R	R	R		Tobramycin, Tigecyklin, Cotrimoxazol	rektal		XDR
	13	3	E. Coli	R	R	R	S	R				Gentamicin, Tobramicin	rektal		MDR
	14	5	E. Faecium	R	n/a	R	R				R	Vancomycin	rektal		MDR
	15	16	E. Coli	R	R	S	S					Piperacillin	rektal		MDR
	16	18	Staph. Aureus		R	R	n/a					Clindamycin, Erythromycin	nose		MDR
	17	29	E. Faecium	R	n/a	R	R				R	Vancomycin, Teicoplanin	rektal		MDR
	18	31	E. Coli	R	R	R	S		R			Cotrimoxazol	rektal		XDR
	19	34	E. Coli	R	R	S	S					Piperacillin	rektal		MDR
	20	35	E. Faecium	R	n/a	R	R				R	Vancomycin, Erythromycin	rektal		MDR/XDR
	21	36	E. Coli	R	R	S	S					Piperacillin	rektal		MDR
	22	46	E. Coli	R	R	S	S		R	R		Tigecycline, Cotrimoxacol	rektal		XDR
	23	46	Klebsiella P.	R	R	R	S	R	R			Cotrimoxazol, Tobramycin, Fosfomycin	urine		XDR
	24	64	E. Faecium	R	n/a	R	R				R	Vancomycin, Erythromycin	rektal		MDR
		A, Aminolykoside (Gentmicin, Tobramycin); B, Anti-MRSA cephalosporine (Ceftaroline); C, antipseudomonale penicillins (piperacillin); D, carbapenems (imipenem, ertapenem); E, 1st/2nd generation cephalosporins (Cefuroxim); F, 3rd/4th generation cephalosporins (ceftazidim); G, cephamycins (cefoxitin); H, fluorquinolones; J, Folate pathway inhibitors; K, Glycylcycline, L, Penicilline + lactamase; M, …
															Table 1:
		Classification of MDRO according to their phenotype													Classifikation of MDRO according to resistance phenotype
				KRINKO Klassen											Enterbacteriaceae spp.
	intrinsic resistance of E faecium against carbapeneme and cephalosporine															Spp.	Phenotype		A	B	C	D	E	F	G	H	I	J	K	L	M	N
															1	E. Coli	ESBL					S		S	S	S	S	S	S	NT	NT	NT
															2	E. Coli	ESBL							S		S	NT	S	NT	NT	NT	NT
															3	E. Coli	ESBL						S		S	S	S	S	NT	NT	NT	NT
															4	E. Coli	3MRGN							S	S	S	S	S	NT	NT	NT	NT
															5	E. Coli	ESBL								S	S	S	S	NT	NT	NT	NT
															6	E. Coli	ESBL					S	S			S		S	NT	NT	NT	NT
															7	E. Coli	ESBL						S		S	S	NT	S	NT	NT	NT	NT
															8	E. Coli	ESBL							S	S	S	S	S	NT	NT	NT	NT
															9	E. Coli	3MRGN									S	S	S	NT	NT	NT	NT
															10	Klebsiella P.	3MRGN										S	S	NT	NT	NT	NT
															11	E. Coli	3MRGN							S	S	S	S	S	NT	NT	NT	NT
															12	Klebsiella P.	ESBL									S	NT	S	NT	NT	NT	NT
															13	E. Coli	ESBL							S		S	NT	S	NT	NT	NT	NT
															14	E. Coli	ESBL						S	S	S	S	S	S	NT	NT	NT	NT
															15	E. Coli	3MRGN								S	S	S	S	NT	NT	NT	NT
															16	E. Coli	ESBL						S	S	S	S	S	S	NT	NT	NT	NT
															17	E. Coli	ESBL						S	S	S	S	S	S	NT	NT	NT	NT
															18	E. Coli	ESBL						S		S		S	S	NT	NT	NT	NT
															19	Klebsiella P.	3MRGN								S	S		S	NT	NT	NT	NT
															A, 1st/2nd generation cephalosporins; B, 3rd/4th generation cephalosporins; C, penicilline + lactamase inhibitor; D, antipseudomonale penicillins; E, fluorquinolones; F, folate pathway inhibitors; G, aminolykoside; H, glycylcycline, I, anti-MRSA cephalosporine; J, phosphonic acids; K, carbapenems; L, polymyxins; M, cephamycins; N, phenicols;
															Enterococcus spp.
																			A	B	C	D	E	F	G	H	I	J	K
															20	E. Faecium	VRE							S	S	S	S	NT	NT
															21	E. Faecium	VRE						S	S	S	S	S	NT	NT
															22	E. Faecium	VRE						S	S	S	S	S	NT	NT
															23	E. Faecium	VRE						S		S	S	S	NT	NT
															A, carbapenems; B, penicillins; C, fluorquinolones; D, glycopeptides; E, aminoglycoside; F, tetracycline; G, glycylcyclines; H, lipopetides; I, oxazolidinones; J, streptomycin; K, streptogramins
															Staphylococcus spp.
																			A	B	C	D	E	F	I	J	K	L	M	NT	O	P	Q	R
															24	Staph. Aureus	MRSA					S	S	S	S	S	S	S	S	NT	NT	NT	NT	NT
															A, fluoroquinolones; B, lincosamides; C, macrolides; D, aminoglycosides; E, ansamycins; F, folate pathway inhibitors; G, glycopeptides; H, glycylcyclines; I, phosphonic acids; J, oxazolidinones; K, tetracyclines; L, anti-staphylococcal b-lactams; M, fucidanes; N, lipopeptides; O, phenicols; P, streptogramins
															MDRO, multidrug resistant organisms; spp., species; E. Coli., Escherichia Coli; Klebsiella P., Klebsiella Pneumoniae; E. Faecium; Enterococcus Faecium; ESBL, Extended Spectrum Beta Lactamase; VRE, Vancomycin Resistant Enterococcus; MRSA, Methicilline Resistant Staphylococcus Aureus; spp., species; NT, not tested; black box indicates phenotypical non-susceptibility to all tested agents in the anti…
